# Supplementary material for: Peripheral denervation participates in heterotopic ossification in a spinal cord injury model
Source: PubMed Central journal article supplement (PMC5576715; doi:10.1371/journal.pone.0182454), 2017-08-30
Supplement: pone.0182454.s001.pdf [file pone.0182454.s001.pdf]

| Bone volumes (microCT, mm3)             | sample | data group 1  |               | data group 2 |     | data group 3  |               |
|-----------------------------------------|--------|---------------|---------------|--------------|-----|---------------|---------------|
|                                         |        | RHL           | LHL           | RHL          | LHL | RHL           | LHL           |
|                                         | 1      | <b>1,26</b>   | <b>0,38</b>   | 0            | 0   | <b>1,34</b>   | <b>0,72</b>   |
|                                         | 2      | <b>2,1</b>    | <b>1,21</b>   | 0            | 0   | <b>0,65</b>   | <b>0,2</b>    |
|                                         | 3      | <b>0,77</b>   | <b>0,17</b>   | 0            | 0   | <b>0,25</b>   | <b>0,09</b>   |
|                                         | 4      | <b>2,25</b>   | <b>0,86</b>   | 0            | 0   | <b>0</b>      | <b>0</b>      |
|                                         | 5      | <b>1,37</b>   | <b>0,22</b>   | 0            | 0   | <b>0</b>      | <b>0</b>      |
|                                         | 6      | <b>1,11</b>   | <b>0,52</b>   | 0            | 0   | <b>0</b>      | <b>0</b>      |
| Number of values                        |        | 6             | 6             |              |     | 3             | 3             |
| Minimum                                 |        | 0,77          | 0,17          |              |     | 0,25          | 0,09          |
| 25% Percentile                          |        | 1,025         | 0,2075        |              |     | 0,25          | 0,09          |
| Median                                  |        | 1,315         | 0,45          |              |     | 0,65          | 0,2           |
| 75% Percentile                          |        | 2,138         | 0,9475        |              |     | 1,34          | 0,72          |
| Maximum                                 |        | 2,25          | 1,21          |              |     | 1,34          | 0,72          |
| Mean                                    |        | <b>1,477</b>  | <b>0,56</b>   |              |     | <b>0,7467</b> | <b>0,3367</b> |
| Std. Deviation                          |        | <b>0,5794</b> | <b>0,4035</b> |              |     | <b>0,5514</b> | <b>0,3365</b> |
| Std. Error of Mean                      |        | 0,2366        | 0,1647        |              |     | 0,3183        | 0,1943        |
| Lower 95% CI                            |        | 0,8686        | 0,1365        |              |     | -0,6231       | -0,4992       |
| Upper 95% CI                            |        | 2,085         | 0,9835        |              |     | 2,116         | 1,173         |
| Wilcoxon matched-pairs signed rank test |        |               |               |              |     |               |               |
| P value                                 |        | <b>0,0313</b> |               |              |     | 0,25          |               |
| Exact or approximate P value?           |        | Exact         |               |              |     | Exact         |               |
| P value summary                         |        | *             |               |              |     | ns            |               |
| Significantly different? (P < 0.05)     |        | Yes           |               |              |     | No            |               |
| One- or two-tailed P value?             |        | Two-tailed    |               |              |     | Two-tailed    |               |
| Sum of positive, negative ranks         |        | 0,0 , -21,00  |               |              |     | 0,0 , -6,000  |               |
| Sum of signed ranks (W)                 |        | -21           |               |              |     | -6            |               |
| Median of differences                   |        |               |               |              |     |               |               |
| Median                                  |        | -0,885        |               |              |     | -0,45         |               |
| How effective was the pairing?          |        |               |               |              |     |               |               |
| rs (Spearman)                           |        | 0,7143        |               |              |     | 1             |               |
| P value (one tailed)                    |        | 0,0681        |               |              |     | 0,1667        |               |
| P value summary                         |        | ns            |               |              |     | ns            |               |
| Significant correlation? (P > 0.05)     |        | Yes           |               |              |     | Yes           |               |
