# Supplementary material for: Peripheral denervation participates in heterotopic ossification in a spinal cord injury model
Source: PubMed Central journal article supplement (PMC5576715; doi:10.1371/journal.pone.0182454), 2017-08-30
Supplement: pone.0182454.s002.pdf [file pone.0182454.s002.pdf]

**Gene expression ratio (QPCR)**

| sample                              | BMP2 18S      |         | BMP2 GAPDH    |          | Alk3 18S      |       | Alk3 GAPDH    |          | ID1 18S       |        | ID1 GAPDH     |          |
|-------------------------------------|---------------|---------|---------------|----------|---------------|-------|---------------|----------|---------------|--------|---------------|----------|
|                                     | SHAM          | SCI     | SHAM          | SCI      | SHAM          | SCI   | SHAM          | SCI      | SHAM          | SCI    | SHAM          | SCI      |
| 1                                   | 0,56          | 0,08    | 45,18475      | 9,267337 | 3,71          | 0,66  | 298,432       | 72,86484 | 1,07          | 1,24   | 86,28071      | 136,9199 |
| 2                                   | 10,84         | 0,82    | 4,088694      | 16,78911 | 45,05         | 22,33 | 16,99067      | 459,7387 | 5,92          | 53,75  | 2,231485      | 1106,743 |
| 3                                   | 2,26          | 0,05    | 16,23829      | 18,54039 | 14,51         | 0,68  | 104,0983      | 262,2426 | 6,65          | 1,9    | 47,72474      | 729,4543 |
| 4                                   | 0,36          | 0,33    | 9,500276      | 3,083675 | 3,58          | 6     | 93,7391       | 55,2407  | 3,18          | 3,37   | 83,19928      | 30,99007 |
| 5                                   | 0,07          | 0,07    | 3,613863      | 2,783436 | 1,25          | 1,05  | 60,29492      | 39,55104 | 1,18          | 1,32   | 56,9346       | 49,5203  |
| 6                                   | 3             | 0,38    | 10,95613      | 94,08148 | 18,37         | 1,31  | 67,08678      | 323,9243 | 27,51         | 3,08   | 100,4533      | 763,8598 |
| 7                                   | 0,48          | 0,36    | 10,42677      | 4,333978 | 6,04          | 2,08  | 131,8018      | 85,2944  | 2,84          | 4,7    | 61,96968      | 197,4792 |
| 8                                   | 0,52          | 0,56    | 19,10367      | 5,415516 | 4,89          | 3,47  | 179,6312      | 31,02634 | 2,32          | 4,8    | 85,04094      | 70,20524 |
| 9                                   | 0,2           | 0,07    | 7,661071      | 6,121233 | 1,7           | 0,27  | 64,82316      | 37,91399 | 2,26          | 0,43   | 86,34801      | 52,39146 |
| 10                                  |               |         |               | 62,8377  |               |       |               | 228,5956 |               |        |               | 367,5162 |
| Number of values                    | 9             | 9       | 9             | 9        | 9             | 9     | 9             | 9        | 9             | 9      | 9             | 9        |
| Minimum                             | 0,07          | 0,05    | 3,614         | 2,783    | 1,25          | 0,27  | 16,99         | 31,03    | 1,07          | 0,43   | 2,231         | 30,99    |
| 25% Percentile                      | 0,28          | 0,07    | 5,875         | 4,021    | 2,64          | 0,67  | 62,56         | 39,14    | 1,72          | 1,28   | 52,33         | 51,67    |
| Median                              | 0,52          | 0,33    | 10,43         | 7,694    | 4,89          | 1,31  | 93,74         | 79,08    | 2,84          | 3,08   | 83,2          | 167,2    |
| 75% Percentile                      | 2,63          | 0,47    | 17,67         | 29,61    | 16,44         | 4,735 | 155,7         | 277,7    | 6,285         | 4,75   | 86,31         | 738,1    |
| Maximum                             | 10,84         | 0,82    | 45,18         | 94,08    | 45,05         | 22,33 | 298,4         | 459,7    | 27,51         | 53,75  | 100,5         | 1107     |
| Mean                                | 2,032         | 0,3022  | 14,09         | 22,33    | 11,01         | 4,206 | 113           | 159,6    | 5,881         | 8,288  | 67,8          | 350,5    |
| Std. Deviation                      | 3,454         | 0,2659  | 12,71         | 30,97    | 14,04         | 7,032 | 83,71         | 149,8    | 8,337         | 17,12  | 29,88         | 382,4    |
| Std. Error of Mean                  | 1,151         | 0,08863 | 4,236         | 9,792    | 4,681         | 2,344 | 27,9          | 47,38    | 2,779         | 5,706  | 9,959         | 120,9    |
| Lower 95% CI of mean                | -0,6226       | 0,09785 | 4,317         | 0,1735   | 0,2165        | -1,2  | 48,65         | 52,45    | -0,5269       | -4,869 | 44,83         | 76,98    |
| Upper 95% CI of mean                | 4,687         | 0,5066  | 23,85         | 44,48    | 21,81         | 9,611 | 177,3         | 266,8    | 12,29         | 21,45  | 90,76         | 624      |
| P value                             | 0,0881        |         | 0,7655        |          | 0,0502        |       | 0,9438        |          | 0,8427        |        | 0,1545        |          |
| Exact or approximate P value?       | Exact         |         | Exact         |          | Exact         |       | Exact         |          | Exact         |        | Exact         |          |
| P value summary                     | ns            |         | ns            |          | ns            |       | ns            |          | ns            |        | ns            |          |
| Significantly different? (P < 0.05) | No            |         | No            |          | No            |       | No            |          | No            |        | No            |          |
| One- or two-tailed P value?         | Two-tailed    |         | Two-tailed    |          | Two-tailed    |       | Two-tailed    |          | Two-tailed    |        | Two-tailed    |          |
| Sum of ranks in column A,B          | 105,0 , 66,00 |         | 94,00 , 96,00 |          | 108,0 , 63,00 |       | 89,00 , 101,0 |          | 88,00 , 83,00 |        | 72,00 , 118,0 |          |
| Mann-Whitney U                      | 21            |         | 41            |          | 18            |       | 44            |          | 38            |        | 27            |          |
